# Supplementary material for: Role of Relative Intentional Rotation of the Femoral Component in Robotic-Assisted Primary Total Knee Arthroplasty as a Tool for the Correction of Medial Flexion Laxity
Source: Research Square preprint supplement (doi:10.21203/rs.3.rs-8372749/v1), 2025-12-22
Supplement: Supplementary file 1 [file 7e80ffc73f4010adc5fca560.docx]

Table – 1: Intraoperative Flexion Gap Measurements

| Name | Side | Post-Tibial Resection (mm) | | | Final Assessment (mm) | | |
| --- | --- | --- | --- | --- | --- | --- | --- |
| Medial | Lateral | Difference | Medial | Lateral | Difference |
| Subject 1 | Right | 16.5 | 8 | 8.5 | 11 | 10 | 1 |
| Subject 2 | Right | 18 | 9.5 | 8.5 | 11.5 | 10 | 1.5 |
| Subject 3 | Right | 10 | 10 | 0 | 12.5 | 12 | 0.5 |
| Subject 4 | Right | 8.5 | 6 | 2.5 | 10 | 10.5 | –0.5 |
| Subject 5 | Left | 7 | 4 | 3 | 13 | 13 | 0 |
| Subject 6 | Left | 12.5 | 10 | 2.5 | 11 | 10 | 1 |
| Subject 7 | Left | 15 | 8 | 7 | 11.5 | 11 | 0.5 |
| Subject 8 | Left | 8 | 6 | 2 | 15 | 13.5 | 1.5 |
| Subject 9 | Left | 10 | 7 | 3 | 15 | 14 | 1 |
| Subject 10 | Right | 10.5 | 8 | 2.5 | 15 | 15 | 0 |
| Subject 11 | Left | 11 | 6 | 5 | 10.5 | 10.5 | 0 |
| Subject 12 | Left | 10 | 8.5 | 1.5 | 13.5 | 11.5 | 2 |
| Mean | | 11.42 | 7.58 |  | 12.46 | 11.75 |  |
| SD | | 3.44 | 1.84 |  | 1.83 | 1.74 |  |
| Flexion Gap Difference | | Mean | | 3.83 |  | | 0.71 |
| SD | | 2.78 |  | | 0.75 |
| 95% CI | | 2.07–5.6 |  | | 0.23–1.19 |
| Flexion Gap Difference  (Paired t-Test) | | Mean Difference | | 3.13 | | | |
| 95% CI | | 1.34–4.91 | | | |
| p | | 0.003 | | | |
| Cohen’s d | | 1.11 | | | |
