# Supplementary material for: Role of Relative Intentional Rotation of the Femoral Component in Robotic-Assisted Primary Total Knee Arthroplasty as a Tool for the Correction of Medial Flexion Laxity
Source: Research Square preprint supplement (doi:10.21203/rs.3.rs-8372749/v1), 2025-12-22
Supplement: Supplementary file 2 [file c221ba061fc83e4e17c71422.docx]

Table – 2: Bilateral RA-TKA

| Name | Side | Rotation | |
| --- | --- | --- | --- |
| Degree | Type |
| Subject 2 | Left | 1 | Internal |
| Right | 10 | Internal |
| Subject 4 | Left | 3 | Internal |
| Right | 2 | Internal |
| Subject 7 | Left | 7 | Internal |
| Right | 1.5 | External |
| Subject 11 | Left | 6.5 | Internal |
| Right | 1 | Internal |
